# Supplementary material
Source: PubMed Central journal article supplement (PMC1691318)
Supplement: 12737661s01.pdf [file 12737661s01.pdf]

This is an electronic appendix to the paper by Schön & Martens 2003 No slave to sex. *Proc. R. Soc. Lond. B* **270**, 827—833. (DOI 10.1098/ rspb.2002.2314.)

Electronic appendices are refereed with the text. However, no attempt has been made to impose a uniform editorial style on the electronic appendices.

### **Electronic Appendix A**

15 out of 17 published examples for gene conversion come from multi copy regions (Afzal *et al.* 2000; Benevolenskaya *et al.* 1997; Charles *et al.* 1997; Chen & Ferec 2000; Cheung *et al.* 1999; DeBry 1998; Gloor & Lankenau 1998; Hughes & Petersen 2001; King 1998; Lazzaro & Clark 2001; Luque *et al.* 1997; Popadic & Anderson 1995; Rourke & East 1997; Wang *et al.* 1999; Zhang *et al.* 2001) versus (Richter *et al.* 1997; Rozas *et al.* 1999).

Afzal, A.R., Florencio, R.N., Taylor, R., Patton, M.A., Saggarr-Malik, A. & Jeffery, S. 2000 Novel mutations in the duplicated region of the polycystic kidney disease 1 (PKD1) gene provides supporting evidence for gene conversion. *Genet. Test* **4**, 365-370.

Benevolenskaya, E.V., Kogan, G.L., Tulin, A.V., Philipp, D. & Gvozdev, V.A. 1997 Segmented gene conversion as a mechanism of correction of 18S rRNA pseudogene located outside of rDNA cluster in *D. melanogaster*. *J. Mol. Evol.* **44**, 646-651.

Charles, J.P., Chihara, C., Nejad, S. & Riddiford, L.M. 1997 A cluster of cuticle protein genes of *Drosophila melanogaster* at 65A: sequence, structure and evolution. *Genetics* **147**, 1213-1224.

Chen, J.M. & Ferec, C. 2000 Gene conversion-like missense mutations in the human cationic trypsinogen gene and insights into molecular evolution of the human trypsinogen family. *Mol. Genet. Metab.* **3**, 463-469.

Cheung, B., Holmes, R.S., Easteal, S. & Beacham, I.R. 1999 Evolution of class I alcohol dehydrogenase genes in catarrhine primates: gene conversion, substitution rates, and gene regulation. *Mol. Biol. Evol.* **16**, 23-36.

DeBry, R.W. 1998 Comparative analysis of evolution in a rodent histone H2a pseudogene. *J. Mol. Evol.* **46**, 355-360.

Gloor, G.B. & Lankenau, D.-H. 1998 Gene conversion in mitotically dividing cells: a view from *Drosophila*. *TIG* **14**, 43-46.

Hughes, K.W. & Petersen, R.H. 2001 Apparent recombination or gene conversion in the ribosomal ITS region of a *Flammulina* (Fungi, Agaricales) hybrid. *Mol. Biol. Evol.* **18**, 94-96.

King, L.M. 1998 The role of gene conversion in determining sequence variation and divergence in the Est-5 gene family in *Drosophila pseudoobscura*. *Genetics* **148**, 305-315.

- Lazzaro, B.P. & Clark, A.G. 2001 Evidence for recurrent paralogous gene conversion and exceptional allelic divergence in the attacin genes of *Drosophila melanogaster*. *Genetics* **159**, 659-671.
- Luque, T., Marfany, G. & Gonzalez-Duarte, R. 1997 Characterization and molecular analysis of Adh retrosequences in species of the *Drosophila obscura* group. *Mol. Biol. Evol.* **12**, 1316-1325.
- Popadic, A. & Anderson, W.W. 1995 Evidence for gene conversion in the amylase multigene family of *Drosophila pseudoobscura*. *Mol. Biol. Evol.* **12**, 564-572.
- Richter, B., Long, M., Lewontin, R.C. & Nitasaka, E. 1997 Nucleotide variation and conservation at the *dpp* locus, a gene controlling early development in *Drosophila*. *Genetics* **147**, 311-323.
- Rourke, I.J. & East, P.D. 1997 Evidence for gene conversion between tandemly duplicated cytoplasmic actin genes of *Helicoverpa armigera* (Lepidoptera: Noctuidae). *J. Mol. Evol.* **44**, 169-177.
- Rozas, J., Segarra, C., Ribo, G. & Aguade, M. 1999 Molecular population genetics of the rp49 gene region in different chromosomal inversions of *Drosophila subobscura*. *Genetics* **151**, 189-202.
- Wang, S., Magoulas, C. & Hickey, D. 1999 Concerted evolution within a trypsin gene cluster in *Drosophila*. *Mol. Biol. Evol.* **19**, 1117-1124.
- Zhang, L., Pond, S.K. & Gaut, B.S. 2001 A survey of the molecular evolutionary dynamics of twenty-five multigene families of four grass taxa. *J. Mol. Evol.* **52**, 144-156.
